# Supplementary material for: Investigation into the adhesion properties of PFAS on model surfaces
Source: Royal Society of Chemistry journal article supplement (doi:10.1039/d4lf00228h), 2024-01-01
Supplement: d4lf00228h1.pdf [file d4lf00228h1.pdf]

1 **Supplementary Information**

2 **Investigation into the adhesion properties of PFAS on model**  
3 **surfaces**

4  
5 *RSC Applied Interfaces*

6 June 22, 2024

7  
8  
9 Jack Welchert<sup>a</sup>, McKenna Dunmyer<sup>b</sup>, Lynn Carroll<sup>b</sup>, Irbis Martinez<sup>b</sup>, Trisha J. Lane<sup>b</sup>, Daniel A.  
10 Bellido-Aguilar<sup>b</sup>, Suchol Savagatrup<sup>b</sup>, Vasiliki Karanikola<sup>b,\*</sup>

11  
12  
13 <sup>a</sup>*Department of Biosystems Engineering, University of Arizona, Tucson, AZ 85721*

14 <sup>b</sup>*Department of Chemical and Environmental Engineering, University of Arizona, Tucson, AZ*  
15 *85721*

16  
17  
18  
19 \*Corresponding authors:

20 Vasiliki Karanikola: email: [vkaranik@arizona.edu](mailto:vkaranik@arizona.edu); phone: +1 (520) 621-5881

21

22 **Supplementary Information**

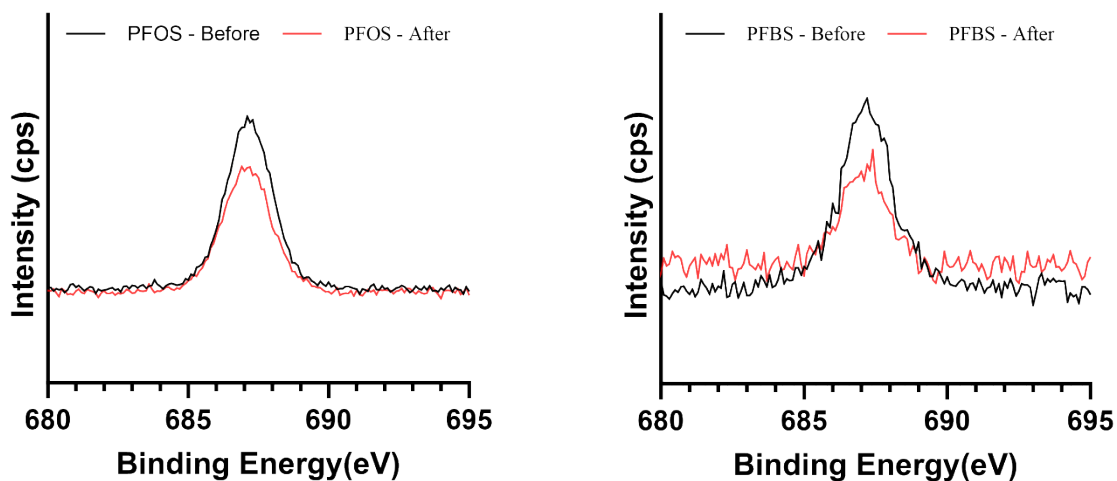

**Figure S1.** Confirmation of fluorine presence on PFOS and PFBS coated AFM tips. XPS scans for fluorine at 698eV for PFOS (left) and PFBS (right).

23

24

25

26

27

28

**Table S1.** Contact angle and roughness values of modified wafers.

29

30

31

32

33

34

35

36

37

| <i>Sample</i> | <i>Contact Angle [°]<br/>(N = 10)</i> | <i>Roughness [nm] (N=3)</i> |
|---------------|---------------------------------------|-----------------------------|
| <i>Plasma</i> | <5                                    | $0.327 \pm 0.056$           |
| <i>APTES</i>  | $64.55 \pm 2.46$                      | $0.250 \pm 0.041$           |
| <i>C8</i>     | $104.52 \pm 1.98$                     | $0.625 \pm 0.073$           |
| <i>C18</i>    | $109.87 \pm 2.44$                     | $0.313 \pm 0.059$           |
